# Physical and functional interaction of the Epstein–Barr virus BZLF1 transactivator with the retinoic acid receptors RAR $\alpha$ and RXR $\alpha$

Nirupama Deshmane Sista<sup>1,3,\*</sup>, Christopher Barry<sup>1</sup>, Kimberly Sampson<sup>1</sup> and Joseph Pagano<sup>1,2,3</sup>

<sup>1</sup>109 UNC-Lineberger Comprehensive Cancer Center, <sup>2</sup>Department of Medicine and <sup>3</sup>Department of Microbiology, University of North Carolina at Chapel Hill, Chapel Hill, NC 27599-7295, USA

Received February 6, 1995; Accepted February 23, 1995

## ABSTRACT

Epstein–Barr virus (EBV) reactivation, indicated by induction of EBV early antigens from latently infected lymphoid cell lines by phorbol esters, is inhibited by retinoic acid (RA). Viral reactivation, which is triggered by the immediate-early BZLF-1 (Z) viral gene product, is repressed by retinoic acid receptors (RARs) RAR $\alpha$  and RXR $\alpha$ . These proteins negatively regulate Z-mediated transactivation of the promoter for an EBV early gene product, early antigen-diffuse (EaD). Here we confirm a direct physical interaction between the AP1-like protein Z and RXR $\alpha$  and map the domains of interaction in the Z protein and RXR $\alpha$ . The domain required for homodimerization of Z is separate from that required for its interaction with RXR $\alpha$ . Z also has the effect of repressing activation of an RAR-responsive cellular promoter (BRE). Point mutants in the dimerization domain of Z unable to interact with RXR $\alpha$  do not repress RXR $\alpha$ -mediated transactivation of BRE, the promoter for RAR $\beta$ , which suggests that interaction between the two proteins is required for this repressor effect. The domain of RXR $\alpha$  required for interaction with Z has been mapped, and is again separate from that required for homodimerization. These results indicate that a 'cross-coupling' or direct interaction between Z and RAR $\alpha$  and RXR $\alpha$  can modulate the reactivation of latent EBV infection and suggest that, reciprocally, the viral protein Z may influence cellular regulatory pathways.

## INTRODUCTION

Epstein–Barr virus (EBV) is a human herpesvirus that infects lymphocytes and certain epithelial cells and is associated with several malignancies. EBV is prominently associated with B-cell lymphomas and rare T-cell malignancies as well as nasopharyngeal and parotid carcinomas. In oral hairy leukoplakia in immunosuppressed persons, EBV replicates rapidly in the differentiated epithelial cells of the tongue. Infection of B-lym-

phocytes is predominantly latent and results in lymphoproliferation. Infection of epithelial cells can be latent, as in nasopharyngeal carcinoma, but usually leads to complete viral replication resulting in cytolysis. In cell culture, several factors can induce the latent virus into its productive phase, such as TPA, sodium butyrate, surface anti-IgG cross-linking and nucleoside analogs, all of which mediate their effect through the EBV immediate-early BZLF-1 protein Z (also called ZEBRA, Zta, EB-1). Z serves as a trigger to disrupt latency by initiating a cascade of events that includes transactivation of other regulatory proteins, BRLF-1 (R) and BMLF-1 (M), which together with Z activate early genes; DNA replication and late gene expression follow (1–3). Therefore, Z is a central target for interaction with cellular proteins, some of which may abrogate Z-mediated transactivation and potentially curb cytolysis.

Z, a member of the basic leucine-zipper family, transactivates the viral early promoters by binding to upstream binding sites, Z-response elements (ZREs) (1–9) that are similar and sometimes identical to AP1 sites (1,2,5,6,8–11). Interaction of cellular or viral factors results in modulation of Z action to produce synergistic transactivation or repression of early promoters. For instance, the viral immediate-early protein R can synergize with Z to transactivate early promoters (12) as does the cellular factor, *c-myb* (13). Recently p53 and p65 have been shown to interact with Z (14,15) and repress Z-mediated transactivation. Thus there are several cellular regulators, some of which tend to counter reactivation of this normally latent infection. In addition, a recently described viral gene product, RAZ, which acts as a transdominant repressor, can abort Z-mediated reactivation in latently infected cells (16).

We have previously shown that the retinoic acid receptor, RAR $\alpha$ , and the retinoid X receptor, RXR $\alpha$ , repress Z-mediated transactivation of the EBV early promoter, BMRF1 (17). RARs and RXRs are members of the steroid hormone receptor superfamily that differ in their ligand-binding domains (18). Retinoic acid (RA) is the ligand for RAR whereas a metabolic derivative of RA, 9-*cis* RA, is the ligand for the RXR receptor (19). The receptors form homo and heterodimers which transcriptionally activate target genes by binding to *cis*-acting elements

\* To whom correspondence should be addressed

called retinoic-acid response elements (RARE). While RARs and RXRs are effective activators of some genes, they are also known to repress several genes by different mechanisms (20,21). Retinoic acid receptors not only repress activation of viral genes by Z, but conversely, Z can also repress RAR $\alpha$  and RXR $\alpha$ -mediated transactivation of a cellular promoter (BRE) for the RAR $\beta$  gene. RXR $\alpha$  prevents Z from binding to an AP1 site in the BMRF1 promoter and, reciprocally, Z inhibits RAR $\alpha$  from binding to a RARE in the RAR $\beta$  promoter (17). Thus these cellular factors can modulate viral activators, and conversely, the viral AP1-like protein can itself affect cellular circuitry. Although steroid hormone receptors, particularly RAR and glucocorticoid receptor (GR), have an antagonistic relation with the AP1 family of proteins (22), both inhibiting AP1 from binding to its cognate DNA sequences (22), a direct physical interaction between the zinc-finger-containing retinoic acid receptors and the leucine-zipper-containing AP1 protein(s) has not been shown.

Here we demonstrate such an interaction between both RXR $\alpha$  and RAR $\alpha$  and the AP1-like Z protein *in vitro* with glutathione-S-transferase fusion proteins. We have mapped the domain in RXR $\alpha$  that interacts with Z and found that it is different from that required for homodimerization of RXR $\alpha$ . Using point mutations in the dimerization domain of Z, we demonstrate that the region required for homodimerization of Z is separate from that required for interaction with RXR $\alpha$ . Corroborating the *in vitro* data are the functional effects observed *in vivo*, namely, that point mutants of Z which do not interact physically with RXR $\alpha$  also do not repress RXR $\alpha$ -mediated transactivation.

## MATERIALS AND METHODS

### Recombinant plasmids

The plasmid pGEX-Z was a generous gift from David Gutsch and Shannon Kenney (University of North Carolina at Chapel Hill). The clones pGEX-RXR $\alpha$ , pRshRAR $\alpha$  and pRshRXR $\alpha$  were generous gifts from Ronald Evans. The plasmids with point mutations in the Z open reading frame (ORF) used to make *in vitro*-translated proteins were generous gifts from Eric Flemington. All the Z mutants were subcloned into pHD1013 for use in transfected cells. The RXR $\alpha$  ORF was subcloned as an *Eco*RI fragment into pBS (Stratagene). The GST-Z fusion protein contains the entire Z ORF cloned downstream of the glutathione transferase gene into the pGEX3X vector (Pharmacia). Constructs containing deletions in the Z ORF removing either 86 N-terminal amino acids ( $\Delta$  1–86), amino acids 25–29 ( $\Delta$  25–29), amino acids 140–227 ( $\Delta$  140–227) or amino acids 200–227 ( $\Delta$  200–227) as well as BMRF1-CAT (gifts from Shannon Kenney) were also used (13).

### GST-fusion-protein affinity chromatography

The GST-Z and GST-RXR $\alpha$  were expressed as previously described (14,23). The ability of <sup>35</sup>S-labelled *in vitro*-translated RXR $\alpha$  to interact with GST-Z was analyzed by affinity chromatography. GST-Z fusion protein bound to beads was incubated with radiolabelled RXR $\alpha$  in reaction buffer (17) for 1 h at 37°C, washed, pelleted and boiled in Laemmli buffer. Bound proteins were resolved by SDS/PAGE on 10% gels and visualized by autoradiography.

### DNA transfections

Plasmid DNA was amplified in *Escherichia coli* and purified through two sequential cesium chloride gradients or by Qiagen columns. DNA was transfected into EBV<sup>-</sup> lymphoblastoid cells (Louckes) by electroporation (24) using 10  $\mu$ g DNA and 10<sup>7</sup> cells/condition. The cells were shocked at 1500 V with a Zapper electroporation unit (Medical Electronics Shop, University of Wisconsin). Twenty-four hours before transfections, cells were transferred to phenol-red-free RPMI 1640 medium supplemented with 5% (v/v) charcoal-stripped serum (CSS). Transfections were done in complete RPMI-1640 (10% v/v FCS), and then cells were returned to medium containing 5% CSS and incubated for 48 h at 37°C in 5% CO<sub>2</sub>. Retinoic acid (RA) (1  $\mu$ M) was added 24 h after transfection.

### Promoter-reporter assays

Cell extracts were prepared 48 h after transfection and 60  $\mu$ g of the cell extract was incubated with <sup>14</sup>C-chloramphenicol in the presence of acetyl CoA at 37°C as described previously (25). The percentage acetylation of chloramphenicol was quantitated by separating the acetylated products by thin-layer chromatography, visualized by autoradiography, and quantitated by scintillation counting of excised spots or by scanning on a Molecular Dynamics PhosphorImager.

### Construction of RXR $\alpha$ mutants

The 3' deletion mutants of RXR $\alpha$  were constructed by linearizing pBSRXR $\alpha$  with *Stu*I (1463) (deletes 36 amino acids) *Bss*III (1185) (deletes 66 amino acids) or with *Bam*HI (777) (deletes 227 amino acids). Mutants spanning the region between *Bss*III and *Bam*HI were obtained by PCR amplification with a 5' primer containing the T7 promoter sequence 5'-CTCGAGAATTGTAATACGACTCATATAGGG-3' and 3' primers at different positions as follows: 5'-CTCGAGCCCTGTCAAAGATGGCGCCC-3' (1101), 5'-CTCGAGGGGAGAAGGAGGCGATGAGCA-3' (999) and 5'-CTCGAGCTCCACCAGGGTGAAAAGC-3' (899). The template was a gel-purified DNA fragment of pBSRXR $\alpha$  containing the intact RXR $\alpha$  ORF downstream of the T7 promoter. The PCR products were gel-purified and then used in *in vitro* transcription-translations to make a <sup>35</sup>S-methionine-labeled protein.

### DNA-binding studies

A 17 bp oligonucleotide containing the AP1 sequence was end-labeled with the use of T4 polynucleotide kinase and [ $\gamma$ -<sup>32</sup>P]ATP and used as probe for binding with *in vitro*-translated Z or Z mutants for 20 min at room temperature. Binding reactions were performed in buffer containing 250 mM Hepes, pH 7.9, 700 mM KCl, 5 mM EDTA, 10 mM DTT and 5% NP-40. Protein-DNA complexes were resolved by PAGE on 5% gels in 0.5  $\times$  TBE (1  $\times$  TBE + 0.09 M Tris-borate/0.002 M EDTA) and the dried gel was exposed with an intensifying screen at -70°C on Kodak XAR film.

## RESULTS

### Retinoic acid receptors RAR $\alpha$ and RXR $\alpha$ bind to the dimerization domain of Z

We have shown that RAR $\alpha$  and RXR $\alpha$  are repressors of Z-mediated transactivation of the EBV early promoter, BMRF1. RXR $\alpha$  interferes with Z binding to the BMRF1 promoter and,

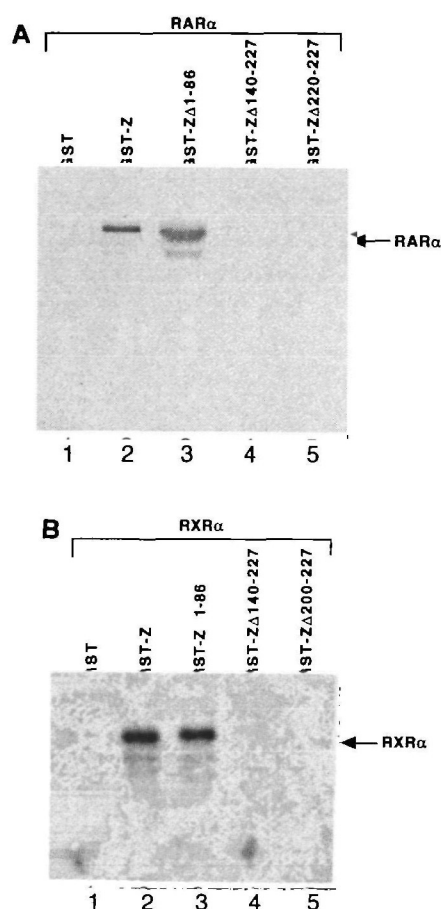

**Figure 1.** Dimerization domain of Z is required for the interaction with RXR $\alpha$  and RAR $\alpha$ . (A) For dimerization experiments,  $^{35}\text{S}$ -labeled RAR $\alpha$  protein (10 000 c.p.m.) was incubated with GST-fusion proteins bound to beads in reaction buffer (10 mM Tris, pH 8.0, 40 mM KCl, 0.05% NP-40, 6% glycerol, 1 mM DTT, 0.2  $\mu\text{g}$  poly dI/dC) for 1 h at 37°C, washed, pelleted and boiled in Laemmli buffer. Bound proteins were resolved on SDS/10% PAGE and visualized by autoradiography. The arrow indicates the position of  $^{35}\text{S}$ -labeled RAR $\alpha$  protein retained by GST protein alone (lane 1) or GST-fusion proteins, GST-Z (lane 2), GST-Z $\Delta$  1–86 (lane 3), GST-Z $\Delta$  140–227 (lane 4) and GST-Z $\Delta$  200–227 (lane 5), GST-Z (lane 2) or GST-RXR $\alpha$  (lane 3) (B) The same GST-fusion proteins were incubated with the beads and then incubated with  $^{35}\text{S}$ -labeled RXR $\alpha$  as described above.

reciprocally, Z interferes with the binding of RXR $\alpha$  to its consensus binding site, a RARE sequence in the cellular promoter for RAR $\beta$  (17). Here we test by affinity chromatography whether RAR $\alpha$  and RXR $\alpha$  interact directly with GST-Z fusion protein. *In vitro*-translated  $^{35}\text{S}$ -methionine-labelled RAR $\alpha$  bound to beads coated with GST-Z (Fig. 1, lane 2), but not to the GST protein alone (lane 1). A mutant of Z, which retains only its DNA-binding and dimerization domain (Z $\Delta$  1–86, lane 3), could still retain RAR $\alpha$  whereas fusion proteins containing deletions in the coiled-coiled dimerization domain of Z (Z $\Delta$  140–227 and Z $\Delta$  200–227, lanes 4 and 5) could not. Similarly, labeled RXR $\alpha$  binds to GST-Z (lane 2) and to Z $\Delta$  1–86 (lane 3) but not to the mutants of Z that have the dimerization domain deleted (lanes 4 and 5) as shown in Figure 1B. These results suggested that either RXR $\alpha$  and RAR $\alpha$  interact within a region of Z corresponding to amino acids 140–227 or that homodimerization of Z is required for interaction with RXR $\alpha$  and RAR $\alpha$ .

## Z binds to RXR $\alpha$ in a region that is not required for homodimerization of Z

To define further the region of Z within the dimerization domain (Fig. 2A) that was required for interaction with RXR $\alpha$ , point mutants of Z (a generous gift from E. Flemington) were radiolabelled (as shown in Fig. 2B) and equal amounts of labeled protein used in affinity-chromatography experiments. These experiments led to the identification of mutants of Z that differentially bound to GST-Z and not to GST-RXR $\alpha$ . The wild-type Z protein bound well to GST-Z (Fig. 2C, lane 2) and GST-RXR $\alpha$  (lane 3) but not to GST alone (lane 1). Two mutants of Z (Z214R/218S and Z214S/218S) that cannot form Z homodimers in glutaraldehyde-crosslinking assays and did not bind to GST-Z (lanes 8 and 10), also did not bind to RXR $\alpha$  (lanes 9 and 11) suggesting that a dimer of Z may be required for this interaction. Both these mutations are at the interface of the predicted Z coiled-coiled homodimer. Another mutant (Z209R/216E), with mutations introduced in residues predicted to be on the back of the helix binds to GST-Z (lane 12) as expected and also interacts with GST-RXR $\alpha$  (lane 13). Furthermore, a protein with mutations of two alanine residues also predicted to be at the back of the helix (Z205R/206D, lane 6) could interact with Z. However, this mutant could not bind to RXR $\alpha$  (lane 7), identifying a region in Z not needed for homodimerization but likely to be involved in its interaction with RXR $\alpha$ . Surprisingly, two Z mutants predicted not to dimerize based on glutaraldehyde-crosslinking studies (26) (Z197K/200S and Z200E/225E) could still interact with GST-Z in the GST-affinity chromatography assays (lanes 4 and 14), but were unable to interact with GST-RXR $\alpha$  (lanes 5 and 15). The results suggest that preservation of a core Z homodimerization domain is needed for interaction with RXR $\alpha$ . However the subdomain of Z that governs the ability to homodimerize may be different from that required to bind to RXR $\alpha$ . Thus we have identified three mutants of Z that could interact with GST-Z but not with GST-RXR $\alpha$ .

## DNA-binding by Z mutants

To determine if the Z point mutants could bind to a Z-DNA binding site, we used the *in vitro*-transcribed and translated proteins in electrophoretic mobility shift assays. A  $^{32}\text{P}$ -labeled 17 bp oligonucleotide containing the API site was incubated with wild-type or mutant Z proteins. As shown in Figure 3, wild-type Z binds to the API site (lane 2), and addition of cold API oligonucleotide competes for this binding (lane 1). Mutants (Z205R/206D, 200E/225E and Z209R/216E) that can still dimerize to Z bind to the API site as well as the wild-type Z, whereas Z197K/200S, which also homodimerizes, does not bind to DNA as well. Mutants Z214R/218R and 214S/218S do not bind to DNA.

## Mutants of Z that retain the transactivation function but not the repressor function

When a construct containing the RAR $\beta$  promoter (BRE-CAT) is co-transfected with any of the retinoic acid receptors (RAR $\alpha$ ,  $\gamma$  and RXR $\alpha$ ) in the presence of RA, there is an increase in the promoter activity. We have shown that when the same promoter is co-transfected with these RARs and Z, promoter activity is completely inhibited (17 and Fig. 4A) and that inhibition is due to a direct interaction of the two proteins which results in Z

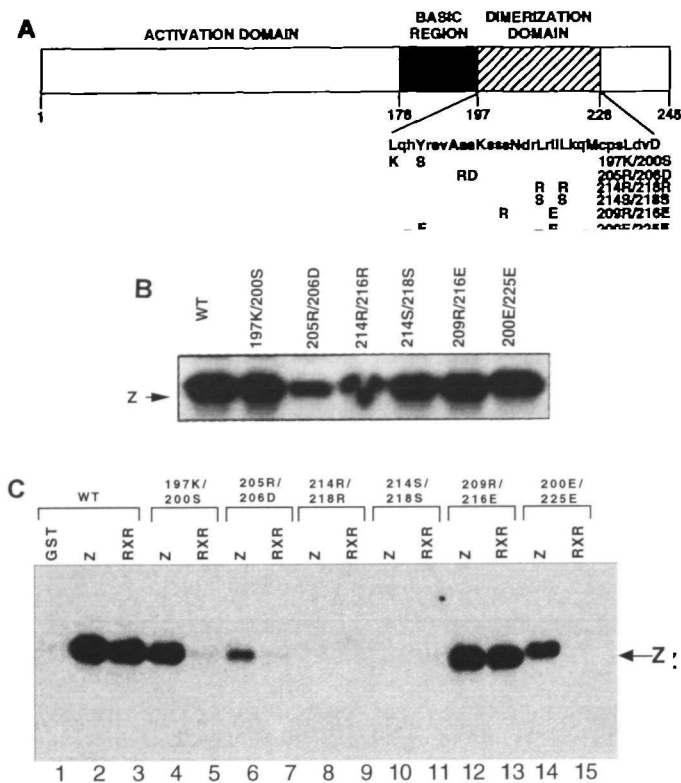

**Figure 2.** Interaction of Z mutants with RXR $\alpha$ . Protein binding experiments were done using Z mutants having point mutations within the dimerization domain of Z as described (A) Schematic diagram of the functional domains of Z and location of the mutations (B) Wild-type (lanes 1–3) or mutant Z proteins that homodimerize, Z197K/200S (lanes 4 and 5), Z205R/206D (lanes 6 and 7), Z209R/216E (lanes 12 and 13) or Z200E/225E (lanes 14 and 15) or mutants that did not homodimerize, Z214R/218R, Z214S/218S (lanes 8–11) were transcribed and translated *in vitro* using <sup>35</sup>S-methionine and analyzed on a 10% SDS/PAGE (C) Proteins were incubated with either GST alone, or GST-Z or GST-RXR $\alpha$  fusion proteins attached to GST-Sepharose beads, washed and boiled samples analyzed on a 10% SDS/PAGE.

interfering with the binding of RAR $\alpha$  to its cognate site in the promoter. To complement these *in vitro* studies we tested whether mutants of Z that were unable to bind to RXR $\alpha$  *in vitro* would no longer interact with RXR $\alpha$  in the cell as indicated by inability to down-regulate an RXR $\alpha$ -responsive promoter. BRE-CAT was co-transfected with expression clones of RXR $\alpha$  and each of the Z mutants into EBV<sup>-</sup> lymphoblastoid cells (Louckes) and treated with RA (1  $\mu$ M) 24 h before harvesting. Repression of RXR $\alpha$ -mediated activity by wild-type Z protein was considered to be 100% (Fig. 4B, bar 1). Z protein with a deletion in the transactivation domain of Z (Z $\Delta$  25–29) or Z209R/216E can still repress >90% of the activity (bars 2 and 10). However, when mutants that did not bind to RXR $\alpha$  *in vitro* such as Z197K/200S (bar 5) were co-transfected with RXR $\alpha$ , only a 22% repression of activity resulted. Similarly, co-transfection of Z205R/206D (bar 6) and Z200E/225E (bar 7) with RXR $\alpha$  (neither mutant binds to RXR $\alpha$ ) had less effect repressing only 30 and 18%, respectively, of promoter activity. Z mutants (Z214R/218R and Z214S/218S) (bars 8 and 9) that interacted with neither Z nor RXR $\alpha$  could not repress transactivation of BRE-CAT by RXR $\alpha$ . The plasmids Z $\Delta$  140–227 (bar 3) and Z $\Delta$  200–227 (bar 4) serve as negative controls, since the Z protein expressed from these constructs does

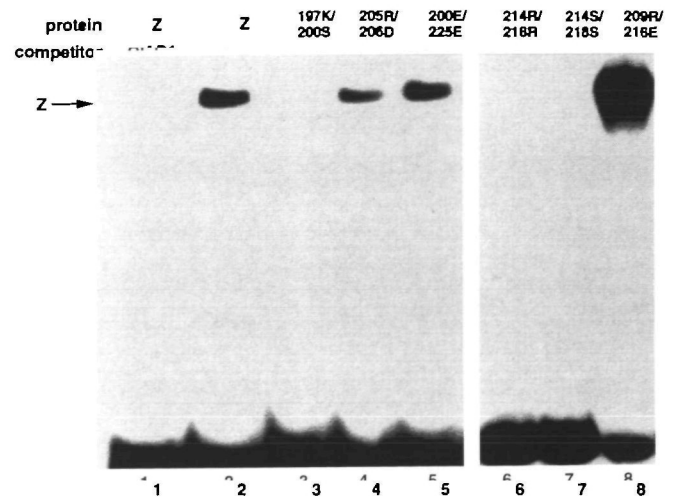

**Figure 3.** DNA-binding of Z mutants Wild-type (lanes 1 and 2) or mutant Z proteins Z197K/200S (lane 3), Z205R/206D (lane 4), or Z200E/225E (lane 5), Z214R/218R (lane 6), Z214S/218S (lane 7) and Z209R/216E (lane 8) were transcribed and translated *in vitro* and incubated with radiolabelled DNA probe containing an intact API site in reaction buffer as described in Materials and Methods

not contain its nuclear localization signal. Thus the mutants of Z that could not bind to RXR $\alpha$  *in vitro* could not repress RXR $\alpha$ -mediated transactivation *in vivo*.

To test further whether the *in vitro* results correspond with interactions *in vivo* we used mutants that could homodimerize (Z197K/200S, Z205R/206D, Z200E/225E and Z209R/216E); these mutants can transactivate the Z-responsive EBV early promoter, BMRF1. As shown in Figure 5, co-transfection of the BMRF1-CAT construct with Z results in ~70-fold increase in activity (bar 1). Co-transfection of Z197K/200S (bar 2) can still induce at least 28-fold increase in activity, and Z205R/206D (bar 3), Z200E/225E (bar 6) and Z209R/216E (bar 7) can transactivate as well as and sometimes better than wild-type Z corroborating the *in vitro* results. In contrast, Z214R/218R and Z214S/218S (bars 4 and 5), which did not interact with wild-type GST-Z *in vitro*, could not transactivate BMRF1-CAT.

### Mapping of the RXR $\alpha$ domain required for interaction with Z

Steroid hormone receptors including RARs/RXRs have a tripartite modular structure. The receptors have three identified domains: transactivation, DNA-binding and ligand-binding. The ligand-binding domain encompasses amino acids 240–462 at the C-terminus. Studies of dimerization with RXR $\alpha$  and interactions with other proteins suggested that the homodimerization domain of RXR $\alpha$  was in the C-terminus of the protein spanning amino acids 415–462 (27–31). We tested a series of C-terminal-truncated proteins that were expressed as described in Materials and Methods (Fig. 6A). As shown in Figure 6B, wild-type RXR $\alpha$  binds just as well to GST-Z (lane 2) as to GST-RXR $\alpha$  (lane 3). A mutant protein containing deletions of 60 amino acids in the C-terminus of RXR $\alpha$  also binds well to GST-Z (lane 4) and weakly to GST-RXR $\alpha$  (lane 5). RXR $\alpha$  with 92 amino acids deleted can be retained by GST-Z (lane 6) but weakly if at all by GST-RXR $\alpha$  (lane 7). RXR $\alpha$  mutants with 122 or more amino

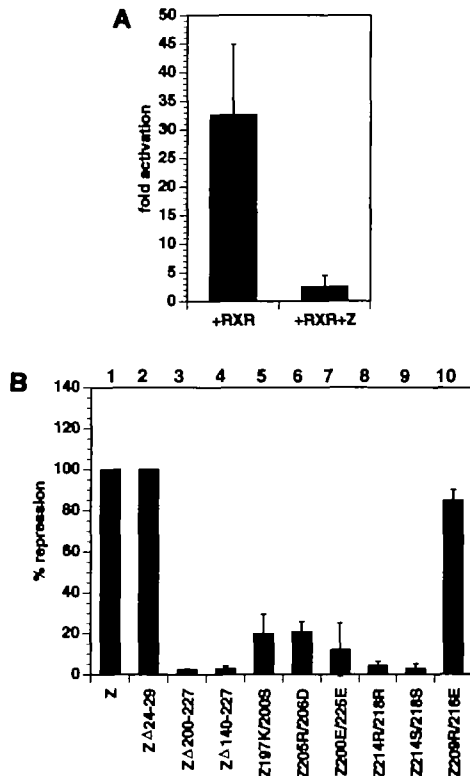

**Figure 4.** Effect of Z mutants on RXR $\alpha$ -mediated transactivation of the cellular promoter for RAR $\beta$ . (A) The BRE-CAT construct was transfected into EBV-negative lymphoid cells, (Louckes) and co-transfected with pHD1013 (bar 1) or expression clones of wild-type Z protein (bar 2). (B) The BRE-CAT was also co-transfected with pHD1013, Z (bar 1) or a protein with a mutation in the transactivation domain Z (Z $\Delta$  25–29, bar 2), a protein with the leucine-zipper deleted (Z $\Delta$  200–227, bar 3), a protein with 87 amino acids deleted from the dimerization domain of Z (Z $\Delta$  140–227, bar 4) or point mutants that did not interact with RXR $\alpha$ , Z197K/200S (bar 5), Z205R/206D (bar 6), Z200E/225E (bar 7), Z214R/218R (bar 8), Z214S/218S (bar 9) and Z209R/216E (bar 10) as indicated. The cells were starved for 24 h before transfection, and RA (1  $\mu$ M) was added 24 h after transfection. The promoter activity was assayed as described in Materials and Methods.

acids deleted from the C-terminus (lanes 8–15) had drastically reduced ability to bind to GST-Z or GST-RXR $\alpha$ . Therefore the domain of RXR $\alpha$  that interacts with Z seems to be separate from its homodimerization domain.

## DISCUSSION

The EBV immediate-early protein, Z, is sufficient to trigger disruption of viral latency. Z, a member of the b-Zip family of proteins, forms homodimers and transactivates EBV early promoters containing *cis*-acting elements (ZREs) that start a cascade of events resulting in viral reactivation. Latency is almost certainly largely governed by cellular factors, and negation of leaky Z function would be necessary to maintain it. Retinoic acid receptors are excellent candidates for such regulatory cellular factors since they affect the status of cell differentiation which is important for different EBV infection states. Here we show that the reciprocal effects of retinoic acid receptors and Z in repressing activation of viral and cellular promoters are based on direct physical interaction between Z and RXR $\alpha$ . Mapping of the regions of Z and RXR $\alpha$  that are involved shows that RXR $\alpha$  binds

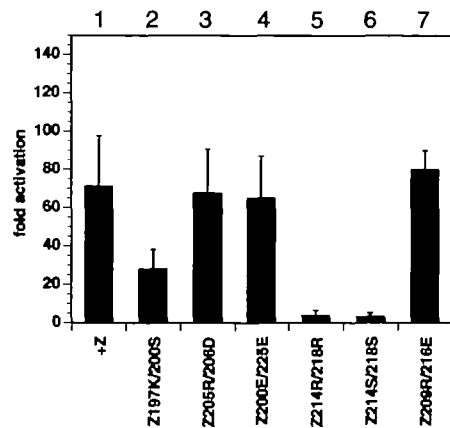

**Figure 5.** Effect of Z mutants on transactivation of the EBV BMRF1 promoter. The BMRF1-CAT construct was transfected into EBV-negative lymphoid cells (Louckes), and co-transfected with expression clones of wild-type Z protein (bar 1) or point mutants, Z197K/200S (bar 2), Z205R/206D (bar 3), Z200E/225E (bar 4), Z214R/218R (bar 5), Z214S/218S (bar 6) and Z209R/216E (bar 7). The cells were starved in charcoal-stripped serum for 24 h before transfection. Promoter activity was assayed as before.

to Z within its dimerization domain (Fig. 1A). Furthermore, RXR $\alpha$  also directly interacts with Z *in vitro* (Fig. 1B).

The Z protein functions as a coiled-coiled dimer (26). However, within this domain the region required for interaction with RXR $\alpha$  is distinct from that required for interaction with itself, as illustrated by the mutant Z205R/206D that can still bind to GST-Z but does not bind to RXR $\alpha$  (Fig. 2). The results differ from earlier results indicating that Z200E/225E could not form homodimers; here we show that this mutant can bind to GST-Z. Furthermore this mutant can bind to DNA (Fig. 3) and can transactivate a Z-responsive promoter (Fig. 5). The mutant DNA clones were confirmed by DNA sequencing. It is possible that these differences in the dimerization potential of the mutant Z proteins were detected because of the two different methods of analysis. Glutaraldehyde-crosslinking may not be as sensitive as GST-Z affinity chromatography. In our hands these mutants homodimerize well. It is also possible that the GST-Z fusion protein stabilizes the interaction with some of the mutants and thus binds to them under certain temperature and reaction conditions. However, the DNA-binding capacity of the mutants and the fact that these mutants can transactivate the BMRF1-CAT promoter construct in lymphoid cells as well as wild-type Z make a definitive case.

Point mutants of Z that differentially bind to Z but not to RXR $\alpha$  can be explained by the model shown in Figure 7. Z homodimers (or multimers) may present an interface for interaction with RXR $\alpha$  to form a higher order complex that is disrupted in Z mutants exemplified by Z205R/206D. Therefore these mutants can still homodimerize but can not bind to RXR $\alpha$ . Part of this interface may overlap with the dimerization interface, or there may be a change in conformation, so that mutants like Z197K/200S that dimerize well in this assay may not form dimers under some conditions. Mutants like Z209R/216E may be able to dimerize under both conditions, perhaps because the mutation is not in the interface presented to the receptor or the interface required for homodimerization. On the other hand, mutant Z214R/218R cannot homodimerize and therefore cannot present



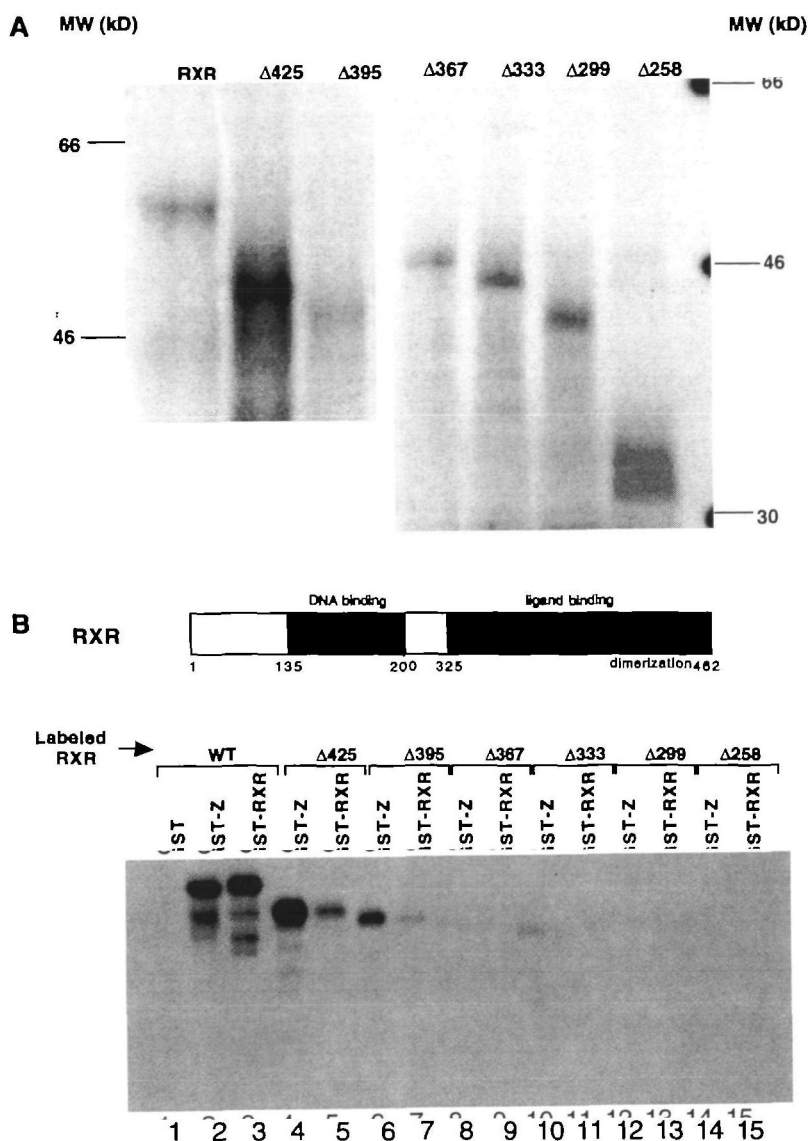

**Figure 6.** Interaction of RXR $\alpha$  mutants with Z. (A) The 3' deletion mutants of RXR $\alpha$  were constructed by linearizing pBSRXR $\alpha$  with *Stu*I (1463),  $\Delta 425$ , (lanes 4 and 5) deleting 60 amino acids, *Bss*III (1185),  $\Delta 395$ , deleting 92 amino acids, or with *Bam*HI (777),  $\Delta 258$ , deleting 257 amino acids. Mutants spanning the region between *Bss*III and *Bam*HI were obtained by PCR amplification as described in Materials and Methods. The PCR products were gel purified and used in *in vitro* transcription and translation using  $^{35}$ S-methionine. (B) Equal amounts of radiolabelled mutant RXR $\alpha$  proteins were incubated with GST-Z or GST-RXR $\alpha$  and analyzed using SDS/PAGE.

an interface for interaction with dimers or multimers of RXR $\alpha$  to form a higher order complex.

The identification of Z mutants that differentially bind to Z and not RXR $\alpha$  enabled probing for effects of interaction between Z and RXR $\alpha$  in cells. Mutants of Z that did not bind to RXR $\alpha$  *in vitro* were incapable of repressing RXR $\alpha$ -mediated transactivation *in vivo* (Fig. 4). In contrast, these mutants could form homodimers and could transactivate the Z-responsive promoter as well as wild-type Z; Z mutants that did not homodimerize could not activate the promoter (Fig. 5). On the other hand, a mutant (Z197K/200S) which could not bind to DNA well could still transactivate the Z-responsive promoter, but transactivation was very variable and never as much as with wild-type Z. It has been reported that Z may have a transactivation function independent of DNA binding. Several groups have provided

evidence that non-DNA binding forms of Z may be generated post-transcriptionally (32). Mutant Z proteins that cannot bind DNA have been shown to transactivate Z-responsive promoters. Transactivation by such Z mutants may be mediated through interaction with cellular transcription factors. Such DNA-binding mutants of Z can activate transcription through a cAMP-response element (CRE) and NF- $\kappa$ B sites but not through ZREs or AP1 (33). Perhaps Z197K/200S falls into this category of mutants and further characterization will be interesting.

Negative regulation by retinoic acid receptors is mediated through very different mechanisms, some of which involve a protein-protein interaction (20,21,34,35). Although RAR $\alpha$  has been shown to inhibit DNA-binding of AP1, this is a demonstration of a physical interaction between a member of the steroid hormone family, which has a zinc-finger motif, and the leucine-

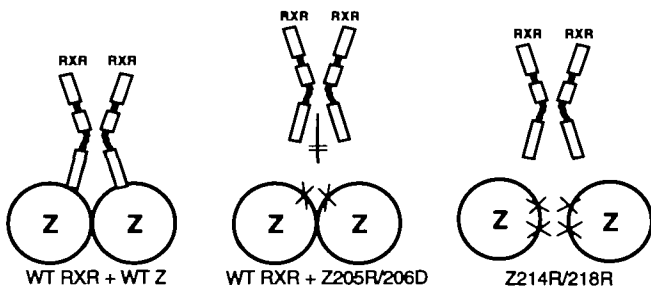

**Figure 7.** Physical interaction between RXR $\alpha$  and Z. A hypothetical model depicting the possible interactions between Z and RXR $\alpha$ . The wild-type Z dimers or multimers may present an interface for interaction with RXR $\alpha$  to form a higher order complex. In mutants like Z205R/206D, the interface may be disrupted although homodimerization of Z is still possible. In other mutants such as Z214R/218R, homodimers cannot be formed and thus do not allow the formation of the interface.

zipper-containing Z protein, which belongs to the b-Zip family. Mapping of the RXR $\alpha$  domain required for interaction has indicated that Z binds to an internal region of the ligand-binding domain of RXR $\alpha$ . The E region of the receptors is required for homodimerization of RXR $\alpha$  and heterodimerization with retinoic acid receptor (RAR) and thyroid hormone receptor (TR) (27–31). Forman and Samuels proposed that the ligand-binding domain encompasses nine short hydrophobic heptad regions (30). The ninth C-terminal heptad is required for the heterodimerization of RXR $\alpha$  with other members of the receptor family such as RAR and TR (36). In contrast, both vitamin D<sub>3</sub> receptor (VDR) and peroxisome-proliferator-activated receptor (PPAR) require additional N-terminal RXR sequences for heterodimerization (37). Although deletion of the C-terminal 40 amino acid segment from the ligand-binding domain of RXR $\alpha$  abolishes the interface for heterodimerization, homodimerization may require the region spanning amino acids 415–425. The DNA-binding domain also presents an interface for stable homodimer formation (38). The results indicate that the loss of the C-terminal 60 amino acids of RXR $\alpha$ , which deletes the ninth heptad but contains the DNA-binding domain, binds weakly to a GST-RXR $\alpha$  fusion protein as expected. However, loss of additional amino acids abolishes the ability of mutant RXR $\alpha$  to bind to GST-RXR $\alpha$ .

Interestingly, Z binds to RXR $\Delta$ 401 (a mutant lacking the ninth heptad), indicating that the heterodimerization domain of RXR $\alpha$  may not be a target for Z interaction. Other members of the receptor family compete for the same interface of RXR $\alpha$  for heterodimerization, and therefore overexpression of one may result in repression of transactivation by another receptor. For example, since TR and RAR $\alpha$  bind to the same interface of RXR $\alpha$ , overexpression of TR has been shown to repress RAR $\alpha$ -mediated transactivation (36). These results suggest that Z does not compete with other members of the steroid hormone receptor family for binding to RXR $\alpha$ . Presumably repression of RXR $\alpha$  and RAR $\alpha$ -mediated transactivation is due to direct interaction in a region different from that required for homo- or heterodimerization. Rather it is possible that Z dimers or multimers interact with RXR $\alpha$  homo- or heterodimers or multimers to form a higher order complex.

The potential to form homo- and heterodimers or higher order complexes among the members of the nuclear steroid hormone superfamily within the cell imparts increased diversity and

versatility on the function of the nuclear receptors and thereby on nuclear hormones. Such combinatorial mechanisms also operate within families of transcription factors, including members of the leucine-zipper family and the *c-rel* oncogene family which allows fine tuning of regulation of gene expression (39,40). Intracellular communication also occurs between members of two distinct families of transcription factors, adding another level of regulation. Such cross-talk has been detected between members of the AP1 family and nuclear receptors (22,35,41) or AP1 and the *rel* family (14,42) or, more recently, between the *rel* family and nuclear receptors (43). Viruses are dynamic participants in this intricate circuitry of signals in the cell. It is not surprising then that RARs transactivate the hepatitis B virus enhancer I (44) and initiate induction of the cytomegalovirus enhancer in embryonal cells (45). In contrast, RA has been shown to repress the expression of human papillomavirus 18 E6/E7 genes (46). The interaction between the EBV protein, Z, and RXR $\alpha$  provides an example of communication not only between members of different transcription factor families, but also between the viral and cell factors.

## ACKNOWLEDGEMENTS

We thank Eric Flemington for very generous gifts of Z point mutants and Ronald Evans for the expression clones for RAR $\alpha$  and RXR $\alpha$  as well as the antiserum for RXR $\alpha$ . We thank Alan Rickinson for the monoclonal antibody to Z, BZ-1. We are grateful to Shannon Kenney for Z fusion proteins and BMRF1-CAT and also for valuable discussions throughout the course of this work. This work was supported by grant # 2 PO1 CA19014-17A1 from the National Cancer Institute.

## REFERENCES

- Chevallier-Greco, A., Manet, E., Chavrier, P., Mosnier, C., Daille, J. and Sergeant, A. (1986) *EMBO J.* **5**, 3243–3249.
- Rooney, C. M., Rowe, D. T., Ragot, T. and Farrell, P. J. (1989) *J. Virol.* **63**, 3109–3116.
- Takada, K., Shimizu, S., Sakuma, S. and Ono, Y. (1986) *J. Virol.* **57**, 1016–1022.
- Cox, M. A., Leahy, J. and Hardwick, J. M. (1990) *J. Virol.* **64**, 313–321.
- Farrell, P. J., Rowe, D. T., Rooney, C. M. and Kouzarides, T. (1989) *EMBO J.* **8**, 127–132.
- Flemington, E. and Speck, S. H. (1990) *J. Virol.* **64**, 1227–1232.
- Holley-Guthrie, E. A., Quinlivan, E. B., Mar, E. C. and Kenney, S. (1990) *J. Virol.* **64**, 3753–3759.
- Kenney, S., Kamine, J., Holley, G. E., Mar, E. C., Lin, J. C., Markovitz, D. and Pagano, J. (1989) *J. Virol.* **63**, 3870–3877.
- Uriet, G., Buisson, M., Chambard, P. and Sergeant, A. (1989) *EMBO J.* **8**, 1447–1453.
- Kouzarides, T., Packham, G., Cook, A. and Farrell, P. J. (1991) *Oncogene* **6**, 195–204.
- Lieberman, P. M. and Berk, A. J. (1990) *J. Virol.* **64**, 2560–2568.
- Quinlivan, E., Holley-Guthrie, E., Norris, M., Gutsch, D., Bachenheimer, S. and Kenney, S. (1993) *Nucleic Acids Res.* **21**, 1999–2007.
- Kenney, S. C., Holley, G. E., Quinlivan, E. B., Gutsch, D., Zhang, Q., Bender, T., Giot, J. F. and Sergeant, A. (1992) *Mol. Cell. Biol.* **12**, 136–46.
- Gutsch, D. E., Holley-Guthrie, E. A., Zhang, Q., Stein, B., Blanas, M. A., Baldwin, A. S. and Kenney, S. C. (1994) *Mol. Cell. Biol.* **14**, 1939–1948.
- Zhang, Q., Gutsch, D. and Kenney, S. (1994) *Mol. Cell. Biol.* **14**, 1929–1938.
- Furnari, F. B., Zacny, V., Quinlivan, E. B., Kenney, S. and Pagano, J. S. (1994) *J. Virol.* **68**, 1828–1836.
- Sista, N. D., Pagano, J. S., Liao, W. and Kenney, S. (1993) *Proc. Natl. Acad. Sci. USA* **90**, 3894–3898.
- Mangelsdorf, D. J., Ong, E. S., Dyck, J. A. and Evans, R. M. (1990) *Nature* **345**, 224–229.

- 19 Heyman, R. A., Mangelsdorf, D. J., Dyck, J. A., Stein, R. B., Eichele, G., Evans, R. M. and Thaller, C. (1992) *Cell* **68**, 397–406.
- 20 Lipkin, S. M., Nelson, C. A., Glass, C. K. and Rosenfeld, M. G. (1992) *Proc. Natl. Acad. Sci. USA* **89**, 1209–1213.
- 21 Felli, M. P., Vacca, A., Meco, D., Screpanti, I., Farina, A. R., Maroder, M., Martinotti, S., Petrangeli, E., Frati, L. and Gulino, A. (1991) *Mol. Cell. Biol.* **11**, 4771–4778.
- 22 Schule, R., Rangarajan, P., Kliewer, S., Ransone, L. J., Bolado, J., Yang, N., Verma, I. M. and Evans, R. M. (1990) *Cell* **62**, 1217–1226.
- 23 Mangelsdorf, D. J., Umesono, K., Kliewer, S. A., Borgmeyer, U., Ong, E. S. and Evans, R. M. (1991) *Cell* **66**, 555–561.
- 24 Neumann, E., Schaefer-Ridder, M., Wang, Y. and Hofschneider, P. H. (1982) *EMBO J.* **1**, 841–845.
- 25 Gorman, C. M., Moffat, L. F. and Howard, B. H. (1982) *Mol. Cell. Biol.* **2**, 1044–1051.
- 26 Flemington, E. and Speck, S. H. (1990) *Proc. Natl. Acad. Sci. USA* **87**, 9459–9463.
- 27 Bugge, T. H., Pohl, J., Lonnoy, O. and Stunnenberg, H. G. (1992) *EMBO J.* **11**, 1409–18.
- 28 Marks, M. S., Hallenbeck, P. L., Nagata, T., Segars, J. H., Appella, E., Nikodem, V. M. and Ozato, K. (1992) *EMBO J.* **11**, 1419–1435.
- 29 Glass, C. K., Devary, O. V. and Rosenfeld, M. G. (1990) *Cell* **63**, 729–738.
- 30 Forman, B. M. and Samuels, H. H. (1993) *Mol. Endocrinol.* **4**, 1293–1301.
- 31 Forman, B. M., Yang, C. R., Au, M., Casanova, J., Ghysdael, J. and Samuels, H. H. (1989) *Mol. Endocrinol.* **3**, 1610–1626.
- 32 Lau, R., Packham, G. and Farrell, P. J. (1992) *J. Virol.* **66**, 6233–6236.
- 33 Flemington, E. K., Lytle, J. P., Cayrol, C., Borrás, A. M. and H., S. S. (1994) *Mol. Cell. Biol.* **14**, 3041–3052.
- 34 Schule, R., Rangarajan, P., Yang, N., Kliewer, S., Ransone, L. J., Bolado, J., Verma, I. M. and Evans, R. M. (1991) *Proc. Natl. Acad. Sci. USA* **88**, 6092–6096.
- 35 Nicholson, R. C., Mader, S., Nagpal, S., Leid, M., Rochette-Egly, C. and Chambon, P. (1990) *EMBO J.* **9**, 4443–4454.
- 36 Au-Fleigner, M., Helmer, E., Casanova, J., Raaka, B. M. and Samuels, H. (1993) *Mol. Cell. Biol.* **13**, 5725–5737.
- 37 Kliewer, S. A., Umesono, K., Noonan, D. J., Heyman, R. A. and Evans, R. M. (1992) *Nature* **358**, 771–774.
- 38 Leid, M., Kastner, P., Lyons, R., Nakshatri, H., Saunders, M., Zacharewski, T., Chen, J. Y., Staub, A., Garnier, J. M., Mader, S. and Chambon, P. (1992) *Cell* **68**, 377–395.
- 39 Angel, P. and Karin, M. (1991) *Biochim Biophys Acta* **1072**, 129–157.
- 40 Liou, H.-C. and Baltimore, D. (1993) *Curr. Opin. Cell Biol.* **5**, 477–487.
- 41 Jonat, C., Rahmsdorf, H., Park, K., Cato, A., Gebel, S., Ponta, H. and Herrlich, P. (1990) *Cell* **62**, 1189–1204.
- 42 Stein, B., Cogswell, P. and Baldwin, A. S. (1993) *Mol. Cell. Biol.* **13**, 3964–3974.
- 43 Ray, A. and Prefontaine, K. (1994) *Proc. Natl. Acad. Sci. USA* **91**, 752–756.
- 44 Garcia, A. D., Ostapchuk, P. and Hearing, P. (1993) *J. Virol.* **67**, 3940–3950.
- 45 Ghazal, P., Demattei, C., Giuletti, E., Kliewer, S., Umesono, K. and Evans, R. (1992) *Proc. Natl. Acad. Sci. USA* **89**, 7630–7634.
- 46 Bartsch, D., Boye, B., Baust, C., zur, H. H. and Schwarz, E. (1992) *EMBO J.* **11**, 2283–2291.
